# Supplementary material for: Contrasting sources and processes of particulate species in haze days with low and high relative humidity in winter time Beijing
Source: Copernicus journal article supplement (doi:10.5194/acp-2020-158), 2020-03-09
Supplement: Supplementary file 1 [file acp-2020-158-supplement.pdf]

## Supplement for

### **Contrasting sources and processes of particulate species in haze days with low and high relative humidity in wintertime Beijing**

Ru-Jin Huang<sup>1</sup>, Yao He<sup>1</sup>, Jing Duan<sup>1</sup>, Yongjie Li<sup>2</sup>, Qi Chen<sup>3</sup>, Yan Zheng<sup>3</sup>, Yang Chen<sup>4</sup>, Weiwei Hu<sup>5</sup>, Chunshui Lin<sup>1</sup>, Haiyan Ni<sup>1</sup>, Wenting Dai<sup>1</sup>, Junji Cao<sup>1</sup>, Yunfei Wu<sup>6</sup>, Renjian Zhang<sup>6</sup>, Wei Xu<sup>1,7</sup>, Jurgita Ovadnevaite<sup>7</sup>, Darius Ceburnis<sup>7</sup>, Thorsten Hoffmann<sup>8</sup>, Colin, D. O'Dowd<sup>7</sup>

<sup>1</sup>State Key Laboratory of Loess and Quaternary Geology, Center for Excellence in Quaternary Science and Global Change, and Key Laboratory of Aerosol Chemistry and Physics, Institute of Earth and Environment, Chinese Academy of Sciences, Xi'an 710061, China

<sup>2</sup>Department of Civil and Environmental Engineering, Faculty of Science and Technology, University of Macau, Taipa, Macau, China

<sup>3</sup>State Key Joint Laboratory of Environmental Simulation and Pollution Control, College of Environmental Sciences and Engineering, Peking University, Beijing 100871, China

<sup>4</sup>Chongqing Institute of Green and Intelligent Technology, Chinese Academy of Sciences, Chongqing 400714, China

<sup>5</sup>State Key Laboratory of Organic Geochemistry and Guangdong Key Laboratory of Environmental Protection and Resources Utilization, Guangzhou Institute of Geochemistry, Chinese Academy of Sciences, Guangzhou 510640, China

<sup>6</sup>RCE-TEA, Institute of Atmospheric Physics, Chinese Academy of Sciences, Beijing 100029, China

<sup>7</sup>School of Physics and Centre for Climate and Air Pollution Studies, Ryan Institute, National University of Ireland Galway, University Road, Galway H91CF50, Ireland

<sup>8</sup>Institute of Inorganic and Analytical Chemistry, Johannes Gutenberg University of Mainz, Duesbergweg 10-14, 55128 Mainz, Germany

*Correspondence to:* Ru-Jin Huang (rujin.huang@ieecas.cn)

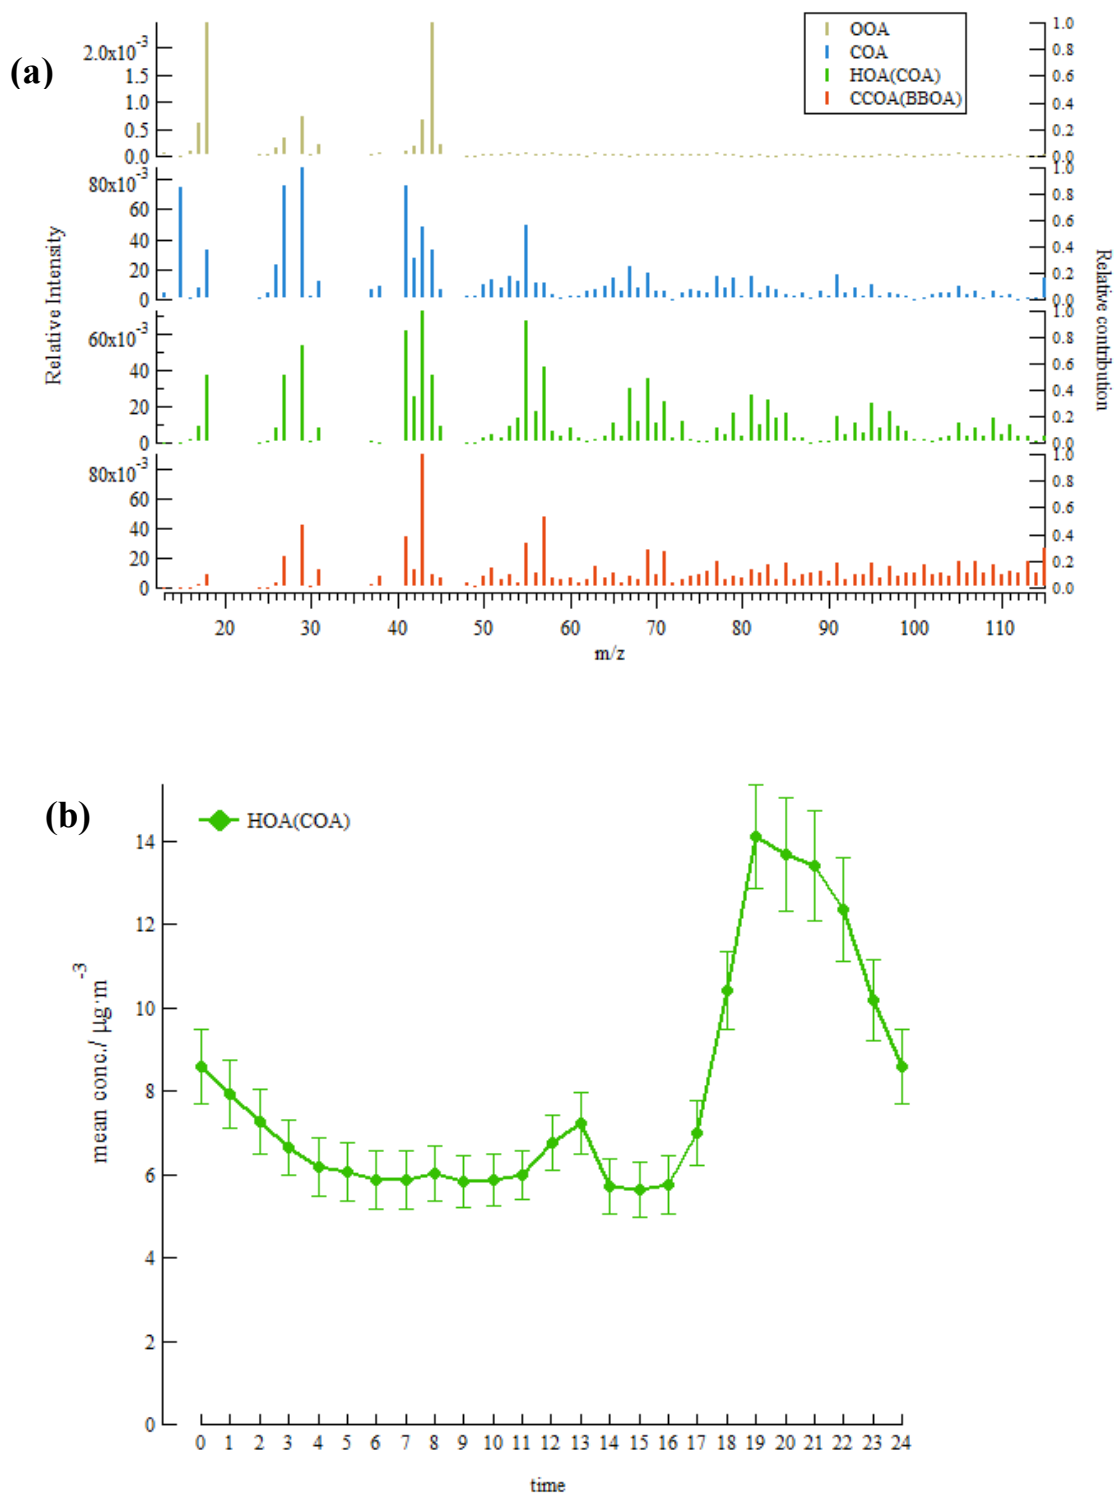

**Figure S1.** The mass spectra (a) and HOA (COA) diurnal variation (b) for 4-factor solution.

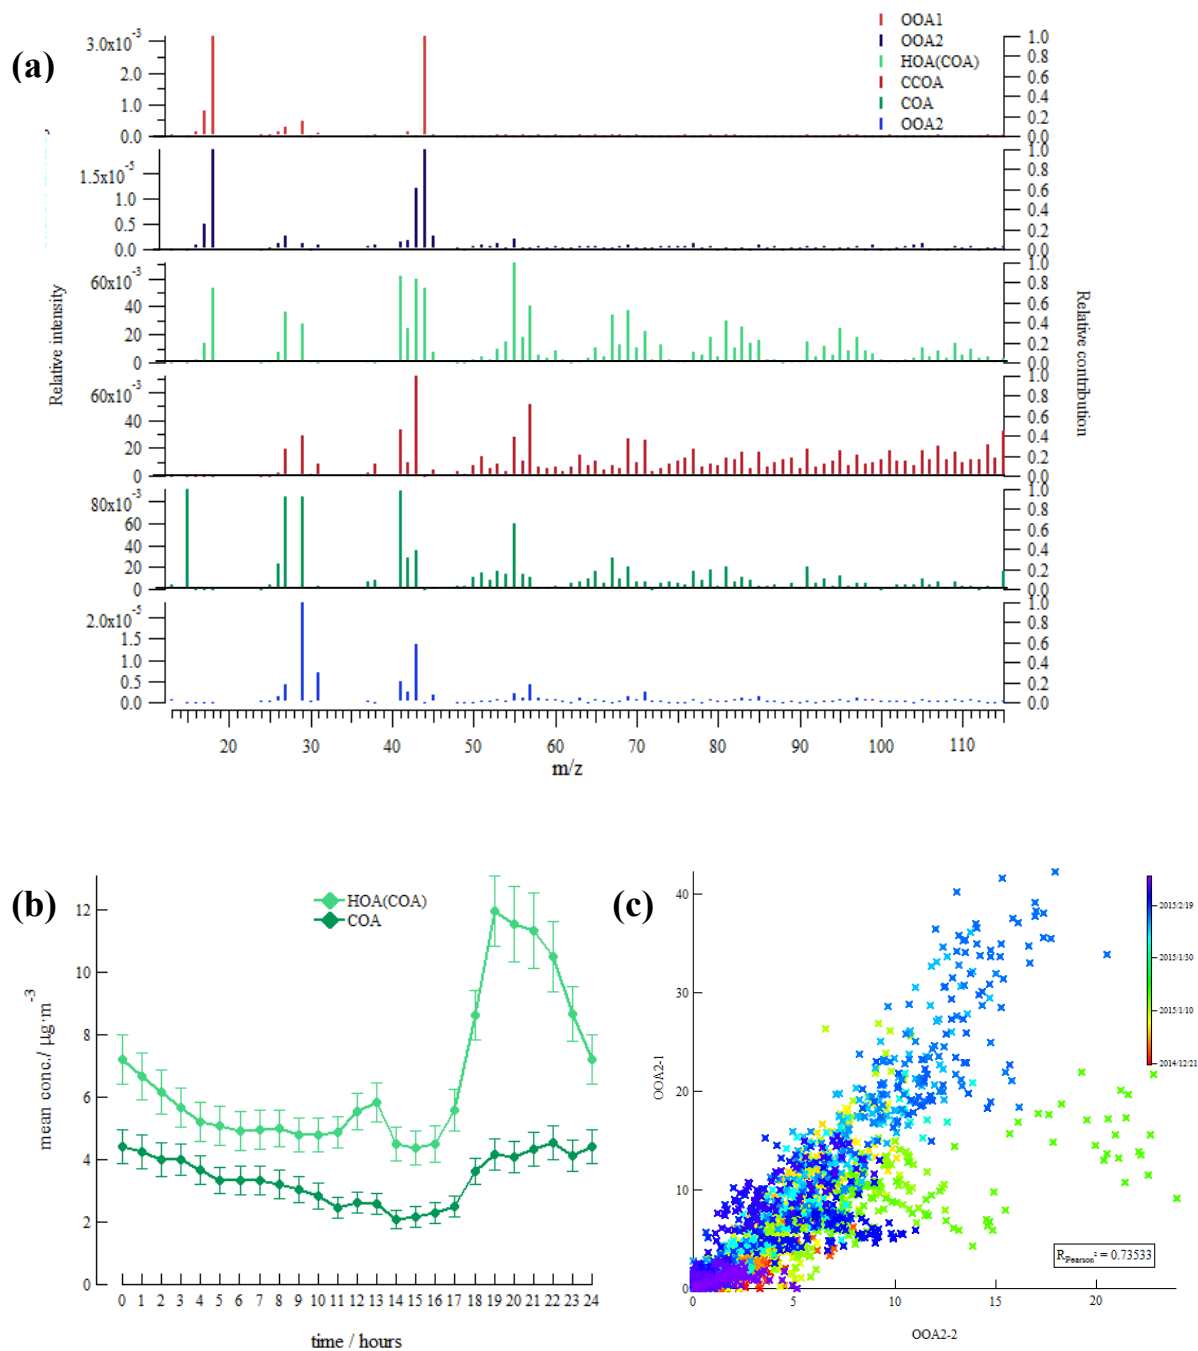

**Figure S2.** The mass spectra (a), HOA and COA diurnal variations (b), and scatter plot of two OOA2 factors for 6-factor solution.

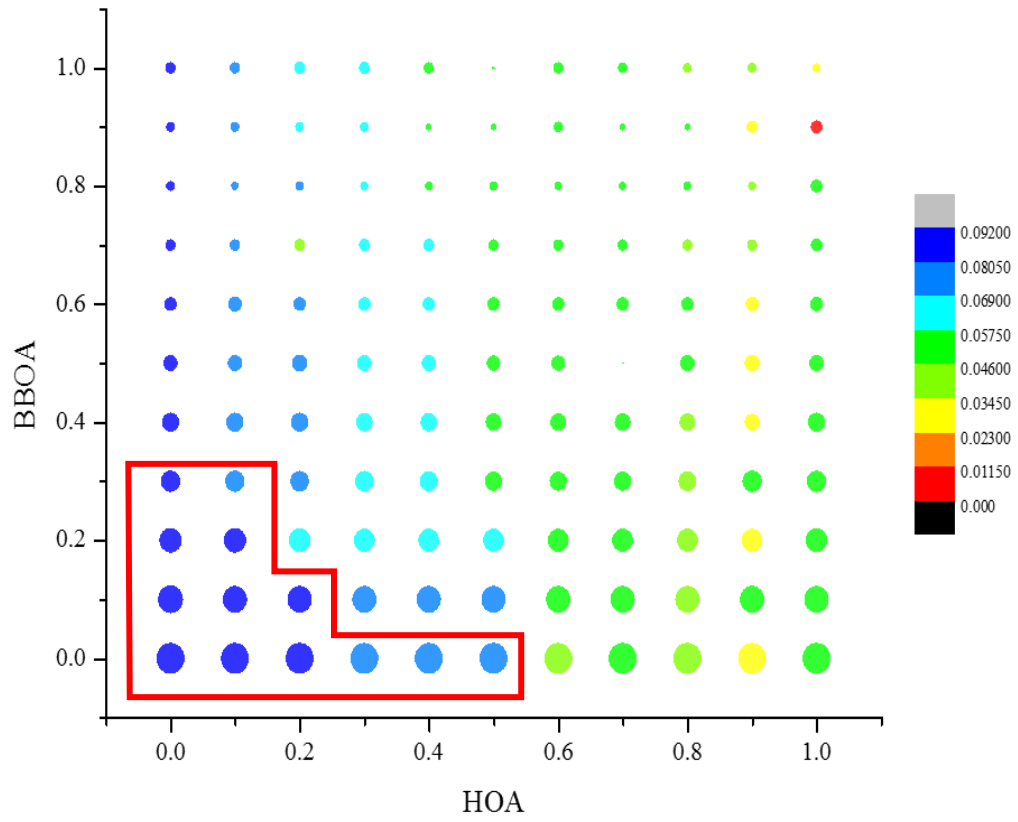

**Figure S3.**  $f_{60}$  of HOA (a, color coded) and  $f_{57}$  of BBOA (b, dot size).

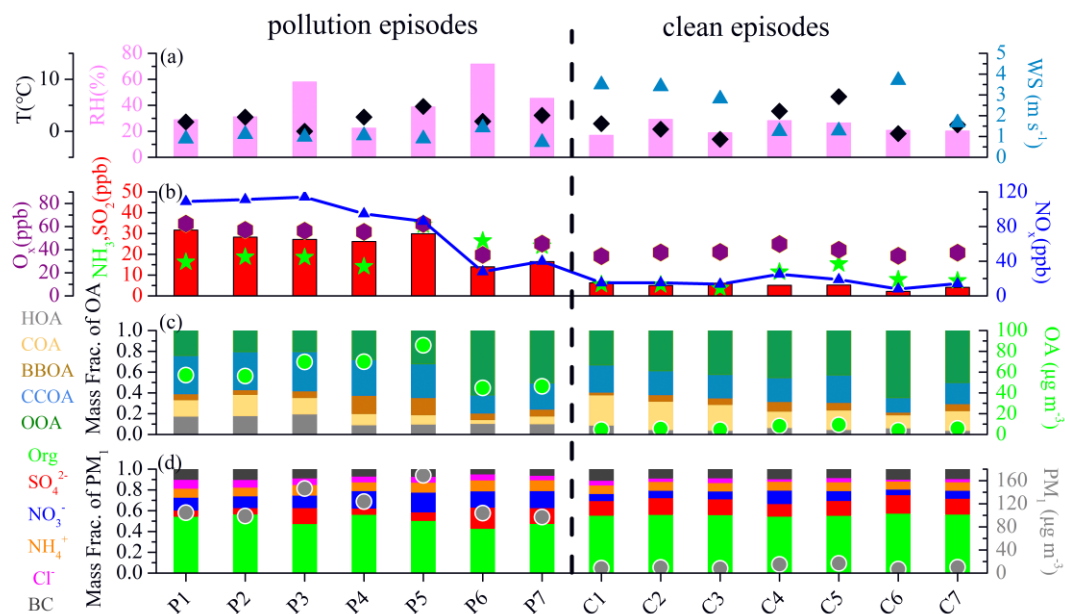

**Figure S4.** The meteorological parameters (wind speed (WS), temperature (T), and relative humidity (RH)), gas pollutants ( $O_x$ ,  $SO_2$ ,  $NH_3$ , and  $NO_x$ ), the fraction contributions and mass concentrations of OA factors and  $PM_{10}$  components during the pollution (P1-P7) and clean (C1-C7) episodes.
